# Supplementary material for: Exome-wide association study to identify rare variants influencing COVID-19 outcomes: Results from the Host Genetics Initiative
Source: PLoS Genet. 2022 Nov 3;18(11):e1010367. doi: 10.1371/journal.pgen.1010367 (PMC9632827; doi:10.1371/journal.pgen.1010367)
Supplement: S2 Table — (XLSX) [file pgen.1010367.s002.xlsx]

## Sheet: DeCOI
Investigators of the DeCOI cohort
DeCOI Host Genetics
(Authors in alphabetical order)
Janine Altmüller 1,2, Max Augustin 3, Daniella Balla 4, Paul Balfanz 5, Robert Bals 6, Kerstin Becker 7,8, Marc M. Berger 9, Michael von Bergwelt-Baildon 10,11,12, Michael Bitzer 13, Fabian Brand 14, Felix Brechtmann 15, Thorsten Brenner 9, Nicolas Casadei 16,17, Markus Cornberg 18, Oliver A. Cornely 19,20,21,22,23, Edgar Dahl 24,25, German Demidov 16,17, Michael Dreher 26, Thomas Eggermann 27, J…
Affiliations:
1 Berlin Institute of Health at Charité, Berlin, Germany
2 Max Delbrueck Center for Molecular Medicine in the Helmholtz Association, Berlin, Germany
3 Department I of Internal Medicine, Faculty of Medicine and University Hospital Cologne, University of Cologne, Cologne, Germany
4 Institute of Human Genetics, School of Medicine and University Hospital Bonn, University of Bonn, Bonn, Germany
5 Department of Cardiology, Angiology and Intensive Care Medicine, University Hospital RWTH Aachen, Germany
6 Department of Internal Medicine V
7 Cologne Center for Genomics, University of Cologne, Cologne, Germany
8 West German Genome Center, site Cologne, University of Cologne, Cologne, Germany
9 Department of Anesthesiology and Intensive Care Medicine, University Hospital Essen, University Duisburg-Essen, Essen, Germany
10 Department of Medicine III, University Hospital, LMU Munich, Munich, Germany
11 COVID-19 Registry of the LMU Munich (CORKUM), University Hospital, LMU Munich, Munich, Germany
12 German Cancer Consortium (DKTK), Partner Site Munich, Munich, Germany
13 Department Internal Medicine I, Eberhard-Karls University, Tuebingen, Germany
14 Institute of Genomic Statistics and Bioinformatics, School of Medicine and University Hospital Bonn, University of Bonn, Bonn, Germany
15 Department of Informatics, Technische Universität München, Munich, Germany.
16 Institute of Medical Genetics and Applied Genomics, University Hospital of Tuebingen, Calwerstr. 7, 72076, Tuebingen, Germany
17 DFG NGS Competence Center Tuebingen (NCCT), University Hospital of Tuebingen, Tuebingen, Germany
18 Department of Gastroenterology, Hepatology and Endocrinology, Hannover Medical School, Carl-Neuberg-Straße 1, 30625 Hannover, Germany
19 University of Cologne, Faculty of Medicine and University Hospital Cologne, Department I of Internal Medicine, Center for Integrated Oncology Aachen Bonn Cologne Duesseldorf, Cologne, Germany
20 University of Cologne, Faculty of Medicine and University Hospital Cologne, Translational Research, Cologne Excellence Cluster on Cellular Stress Responses in Aging-Associated Diseases (CECAD), Cologne, Germany
21 University of Cologne, Faculty of Medicine and University Hospital Cologne, Center for Molecular Medicine Cologne (CMMC), Cologne, Germany
22 University of Cologne, Faculty of Medicine and University Hospital Cologne, Clinical Trials Centre Cologne (ZKS Köln), Cologne, Germany
23 German Centre for Infection Research (DZIF), Partner Site Bonn-Cologne, Cologne, Germany
24 Institute of Pharmacology and Toxicology, Medical Faculty Aachen, RWTH Aachen University, Aachen, Germany
25 RWTH centralized Biomaterial Bank (RWTH cBMB) of the Medical Faculty, RWTH Aachen University, Aachen, Germany
26 Department of Pneumology and Intensive Care Medicine, University Hospital Aachen
27 Institute of Human Genetics, Medical Faculty, RWTH Aachen University, Aachen, Germany
28 Technical University of Munich, School of Medicine, University Hospital rechts der Isar, Department of Internal Medicine II, Munich, Germany
29 Dept. of Gastroenterology, Hepatology and Infectious Diseases, University Hospital Duesseldorf, Germany
30 German Center for Lung Research, Hannover Medical School, Carl-Neuberg-Straße 1, 30625 Hannover, Germany.
31 Department of Respiratory Medicine, Hannover Medical School, Carl-Neuberg-Straße 1, 30625 Hannover, Germany.
32 Quantitative Biology Center (QBiC), University of Tübingen, 72076 Tübingen, Germany
33 German Centre for Infection Research (DZIF), Partner Site Tuebingen, Germany
34 Emergency Department, University Hospital Regensburg, Regensburg, Germany
35 Department for Infectious Diseases and Infection Control, University Hospital Regensburg, Regensburg, Germany
36 Zentrum für Humangenetik Regensburg, Regensburg, Germany
37 West German Genome Center, site Bonn, University of Bonn, Bonn, Germany
38 Department of Child and Adolescent Psychiatry and Psychotherapy, University Hospital Essen, University of Duisburg-Essen, Essen, Germany
39 Hannover Unified Biobank, Hannover Medical School, Feodor-Lynen-Str. 15, 30625 Hannover, Germany
40 Department of Medicine I, University Hospital, LMU Munich, Munich, Germany
41 DZHK (German Centre for Cardiovascular Research), partner site Munich Heart Alliance, Germany
42 Department of Pediatrics, Dr. von Hauner Children’s Hospital, University Hospital LMU Munich, Munich, Germany
43 Dept. of Gastroenterology, Hepatology and Infectious Diseases, University Hospital Magdeburg, Germany
44 Virology, Max von Pettenkofer Institute, Ludwig-Maximilian University Munich, Germany
45 German Center for Infection Research (DZIF), partner site Munich, Germany
46 Institute of Translational Genomics, Helmholtz Zentrum München – German Research Center for Environmental Health, 85764 Neuherberg, Germany
47 Department of Infectiology, University Hospital Essen, University of Duisburg-Essen, Essen, Germany
48 Institute of Tropical Medicine, Universitätsklinikum Tübingen, Tübingen, Germany.
49 Centre de Recherches Medicales de Lambarene, Gabon.
50 Department of Intensive Care, Uniklinik RWTH Aachen, Aachen, Germany
51 Department of Internal Medicine I, RWTH Aachen University Hospital, Aachen, Germany
52 Cluster of Excellence – Controlling Microbes to Fight Infections, University of Tübingen, 72076 Tübingen, Germany
53 Biomedical Data Science, Department of Computer Science, University of Tübingen, 72076 Tübingen, Germany
54 Institute of Virology, Technical University Munich/Helmholtz Zentrum München, Munich, Germany
55 German Center for Infection Research (DZIF), Munich partner site, Munich, Germany
56 Institute of Psychiatric Phenomics and Genomics, University Medical Center, University of Munich, Munich, Germany
57 Department of Psychiatry, University Medical Center, University of Munich, Munich, Germany
58 Munich Clinic Schwabing, Academic Teaching Hospital, Ludwig-Maximilians-University (LMU), Munich, Germany
59 Molecular Oncology Group, Institute of Pathology, Medical Faculty, RWTH Aachen University, Aachen, Germany
60 Vietnamese-German Center for Medical Research (VG-CARE), Hanoi, Vietnam
61 Institute of Clinical Chemistry and Pathobiochemistry, School of Medicine, Technical University of Munich, Germany
62 TranslaTUM, Center for Translational Cancer Research, Technical University of Munich, Germany
63 Department of Infectious Diseases, West German Center of Infectious Diseases, University Hospital Essen, University Duisburg-Essen, Germany
Acknowledgments
NGS was supported by funding from the German Research Foundation (DFG; INST 217/1011-1)) and were performed at the DFG-funded NGS Competence Center Tübingen (INST 37/1049-1) – Project-ID 286/2020B01 – 428994620 and the DFG-funded West German Genome Center (INST 216/981-1) - Project Number 407493903. Funding for this work was further received from the Stiftung Universitätsmedizin Essen, Germany. T…
Conflicts of interest:
OW has received research grants for clinical studies, speaker’s fees, honoraria and travel expenses from Amgen, Alexion, Astellas, Basilea, Biotest, Bristol-Myers Squibb, Correvio, Chiesi, Gilead, Hexal, Janssen, Dr. F. Köhler Chemie, MSD, Novartis, Roche, Pfizer, Sanofi, Takeda, TEVA and UCB. KUL is co-founder and holds equity in the LAMPseq Diagnostics GmbH. UP serves as ad hoc advisor for Sano…

## Sheet: COVID-19 HGI
COVID-19 Human Genetics Initiative
Gita A. Pathak
Juha Karjalainen
Christine Stevens
Shea J. Andrews
Masahiro Kanai
Mattia Cordioli
Renato Polimanti
Matti Pirinen
Nadia Harerimana
Kumar Veerapen
Brooke Wolford
Huy Nguyen
Matthew Solomonson
Rachel G. Liao
Karolina Chwialkowska
Amy Trankiem
Mary K. Balaconis
Caroline Hayward
Anne Richmond
Archie Campbell
Marcela Morris
Chloe Fawns-Ritchie
Joseph T. Glessner
Douglas M. Shaw
Xiao Chang
Hannah Polikowski
Lauren E. Petty
Hung-Hsin Chen
Zhu Wanying
Hakon Hakonarson
David J. Porteous
Jennifer Below
Kari North
Joseph B. McCormick
Paul R. H. J. Timmers
James F. Wilson
Albert Tenesa
Kenton D’Mellow
Shona M. Kerr
Mari E. K. Niemi
Lindokuhle Nkambul
Kathrin Aprile von Hohenstaufen
Ali Sobh
Madonna M. Eltoukhy
Amr M. Yassen
Mohamed A. F. Hegazy
Kamal Okasha
Mohammed A. Eid
Hanteera S. Moahmed
Doaa Shahin
Yasser M. El-Sherbiny
Tamer A. Elhadidy
Mohamed S. Abd Elghafar
Jehan J. El-Jawhari
Attia A. S. Mohamed
Marwa H. Elnagdy
Amr Samir
Mahmoud Abdel-Aziz
Walid T. Khafaga
Walaa M. El-Lawaty
Mohamed S. Torky
Mohamed R. El-shanshory
Chiara Batini
Paul H. Lee
Nick Shrine
Alexander T. Williams
Martin D. Tobin
Anna L. Guyatt
Catherine John
Richard J. Packer
Altaf Ali
Robert C. Free
Xueyang Wang
Louise V. Wain
Edward J. Hollox
Laura D. Venn
Catherine E. Bee
Emma L. Adams
Ahmadreza Niavarani
Bahareh Sharififard
Rasoul Aliannejad
Ali Amirsavadkouhi
Zeinab Naderpour
Hengameh Ansari Tadi
Afshar Etemadi Aleagha
Saeideh Ahmadi
Seyed Behrooz Mohseni Moghaddam
Alireza Adamsara
Morteza Saeedi
Hamed Abdollahi
Abdolmajid Hosseini
Pajaree Chariyavilaskul
Monpat Chamnanphon
Thitima B. Suttichet
Vorasuk Shotelersuk
Monnat Pongpanich
Chureerat Phokaew
Wanna Chetruengchai
Watsamon Jantarabenjakul
Opass Putchareon
Pattama Torvorapanit
Thanyawee Puthanakit
Pintip Suchartlikitwong
Nattiya Hirankarn
Voraphoj Nilaratanakul
Pimpayao Sodsai
Ben M. Brumpton
Kristian Hveem
Cristen Willer
Wei Zhou
Tormod Rogne
Erik Solligard
Bjørn Olav Åsvold
Malak Abedalthagafi
Manal Alaamery
Saleh Alqahtani
Duna Barakeh
Fawz Al Harthi
Ebtehal Alsolm
Leen Abu Safieh
Albandary M. Alowayn
Fatimah Alqubaishi
Amal Al Mutairi
Serghei Mangul
Abdulraheem Alshareef
Mona Sawaji
Mansour Almutairi
Nora Aljawini
Nour Albesher
Yaseen M. Arabi
Ebrahim S. Mahmoud
Amin K. Khattab
Roaa T. Halawani
Ziab Z. Alahmadey
Jehad K. Albakri
Walaa A. Felemban
Bandar A. Suliman
Rana Hasanato
Laila Al-Awdah
Jahad Alghamdi
Deema AlZahrani
Sameera AlJohani
Hani Al-Afghani
May Alrashed
Nouf AlDhawi
Hadeel AlBardis
Sarah Alkwai
Moneera Alswailm
Faisal Almalki
Maha Albeladi
Iman Almohammed
Eman Barhoush
Anoud Albader
Salam Massadeh
Abdulaziz AlMalik
Sara Alotaibi
Bader Alghamdi
Junghyun Jung
Mohammad S. Fawzy
Yunsung Lee
Per Magnus
Lill-Iren S. Trogstad
Øyvind Helgeland
Jennifer R. Harris
Massimo Mangino
Tim D. Spector
Emma Duncan
Sandra P. Smieszek
Bartlomiej P. Przychodzen
Christos Polymeropoulos
Vasilios Polymeropoulos
Mihael H. Polymeropoulos
Israel Fernandez-Cadenas
Jordi Perez-Tur
Laia Llucià-Carol
Natalia Cullell
Elena Muiño
Jara Cárcel-Márquez
Marta L. DeDiego
Lara Lloret Iglesias
Anna M. Planas
Alex Soriano
Veronica Rico
Daiana Agüero
Josep L. Bedini
Francisco Lozano
Carlos Domingo
Veronica Robles
Francisca Ruiz-Jaén
Leonardo Márquez
Juan Gomez
Eliecer Coto
Guillermo M. Albaiceta
Marta García-Clemente
David Dalmau
Maria J. Arranz
Beatriz Dietl
Alex Serra-Llovich
Pere Soler
Roger Colobrán
Andrea Martín-Nalda
Alba Parra Martínez
David Bernardo
Silvia Rojo
Aida Fiz-López
Elisa Arribas
Paloma de la Cal-Sabater
Tomás Segura
Esther González-Villa
Gemma Serrano-Heras
Joan Martí-Fàbregas
Elena Jiménez-Xarrié
Alicia de Felipe Mimbrera
Jaime Masjuan
Sebastian García-Madrona
Anna Domínguez-Mayoral
Joan Montaner Villalonga
Paloma Menéndez-Valladares
Daniel I. Chasman
Julie E. Buring
Paul M. Ridker
Giulianini Franco
Howard D. Sesso
JoAnn E. Manson
Joseph R. Glessner
Hakon Hakonarson
Carolina Medina-Gomez
Andre G. Uitterlinden
M. Arfan Ikram
Kati Kristiansson
Sami Koskelainen
Markus Perola
Kati Donner
Katja Kivinen
Aarno Palotie
Samuli Ripatti
Sanni Ruotsalainen
Mari Kaunisto
Tomoko Nakanishi
Guillaume Butler-Laporte
Vincenzo Forgetta
David R. Morrison
Biswarup Ghosh
Laetitia Laurent
Alexandre Belisle
Danielle Henry
Tala Abdullah
Olumide Adeleye
Noor Mamlouk
Nofar Kimchi
Zaman Afrasiabi
Nardin Rezk
Branka Vulesevic
Meriem Bouab
Charlotte Guzman
Louis Petitjean
Chris Tselios
Xiaoqing Xue
Erwin Schurr
Jonathan Afilalo
Marc Afilalo
Maureen Oliveira
Bluma Brenner
Pierre Lepage
Jiannis Ragoussis
Daniel Auld
Nathalie Brassard
Madeleine Durand
Michaël Chassé
Daniel E. Kaufmann
G. Mark Lathrop
Vincent Mooser
J. Brent Richards
Rui Li
Darin Adra
Souad Rahmouni
Michel Georges
Michel Moutschen
Benoit Misset
Gilles Darcis
Julien Guiot
Julien Guntz
Samira Azarzar
Stéphanie Gofflot
Yves Beguin
Sabine Claassen
Olivier Malaise
Pascale Huynen
Christelle Meuris
Marie Thys
Jessica Jacques
Philippe Léonard
Frederic Frippiat
Jean-Baptiste Giot
Anne-Sophie Sauvage
Christian von Frenckell
Yasmine Belhaj
Bernard Lambermont
Mari E. K. Niemi
Sara Pigazzini
Lindokuhle Nkambule
Michelle Daya
Jonathan Shortt
Nicholas Rafaels
Stephen J. Wicks
Kristy Crooks
Kathleen C. Barnes
Christopher R. Gignoux
Sameer Chavan
Triin Laisk
Kristi Läll
Maarja Lepamets
Reedik Mägi
Tõnu Esko
Ene Reimann
Lili Milani
Helene Alavere
Kristjan Metsalu
Mairo Puusepp
Andres Metspalu
Paul Naaber
Edward Laane
Jaana Pesukova
Pärt Peterson
Kai Kisand
Jekaterina Tabri
Raili Allos
Kati Hensen
Joel Starkopf
Inge Ringmets
Anu Tamm
Anne Kallaste
Pierre-Yves Bochud
Carlo Rivolta
Stéphanie Bibert
Mathieu Quinodoz
Dhryata Kamdar
Noémie Boillat
Semira Gonseth Nussle
Werner Albrich
Noémie Suh
Dionysios Neofytos
Véronique Erard
Cathy Voide
Rafael de Cid
Iván Galván-Femenía
Natalia Blay
Anna Carreras
Beatriz Cortés
Xavier Farré
Lauro Sumoy
Victor Moreno
Josep Maria Mercader
Marta Guindo-Martinez
David Torrents
Manolis Kogevinas
Judith Garcia-Aymerich
Gemma Castaño-Vinyals
Carlota Dobaño
Alessandra Renieri
Francesca Mari
Chiara Fallerini
Sergio Daga
Elisa Benetti
Margherita Baldassarri
Francesca Fava
Elisa Frullanti
Floriana Valentino
Gabriella Doddato
Annarita Giliberti
Rossella Tita
Sara Amitrano
Mirella Bruttini
Susanna Croci
Ilaria Meloni
Maria Antonietta Mencarelli
Caterina Lo Rizzo
Anna Maria Pinto
Giada Beligni
Andrea Tommasi
Laura Di Sarno
Maria Palmieri
Miriam Lucia Carriero
Diana Alaverdian
Stefano Busani
Raffaele Bruno
Marco Vecchia
Mary Ann Belli
Nicola Picchiotti
Maurizio Sanarico
Marco Gori
Simone Furini
Stefania Mantovani
Serena Ludovisi
Mario Umberto Mondelli
Francesco Castelli
Eugenia Quiros-Roldan
Melania Degli Antoni
Isabella Zanella
Massimo Vaghi
Stefano Rusconi
Matteo Siano
Francesca Montagnani
Arianna Emiliozzi
Massimiliano Fabbiani
Barbara Rossetti
Elena Bargagli
Laura Bergantini
Miriana D’Alessandro
Paolo Cameli
David Bennett
Federico Anedda
Simona Marcantonio
Sabino Scolletta
Federico Franchi
Maria Antonietta Mazzei
Susanna Guerrini
Edoardo Conticini
Luca Cantarini
Bruno Frediani
Danilo Tacconi
Chiara Spertilli
Marco Feri
Alice Donati
Raffaele Scala
Luca Guidelli
Genni Spargi
Marta Corridi
Cesira Nencioni
Leonardo Croci
Maria Bandini
Gian Piero Caldarelli
Paolo Piacentini
Elena Desanctis
Silvia Cappelli
Anna Canaccini
Agnese Verzuri
Valentina Anemoli
Agostino Ognibene
Alessandro Pancrazzi
Maria Lorubbio
Antonella D’Arminio Monforte
Federica Gaia Miraglia
Massimo Girardis
Sophie Venturelli
Andrea Cossarizza
Andrea Antinori
Alessandra Vergori
Arianna Gabrieli
Agostino Riva
Daniela Francisci
Elisabetta Schiaroli
Francesco Paciosi
Pier Giorgio Scotton
Francesca Andretta
Sandro Panese
Renzo Scaggiante
Francesca Gatti
Saverio Giuseppe Parisi
Stefano Baratti
Matteo Della Monica
Carmelo Piscopo
Mario Capasso
Roberta Russo
Immacolata Andolfo
Achille Iolascon
Giuseppe Fiorentino
Massimo Carella
Marco Castori
Giuseppe Merla
Gabriella Maria Squeo
Filippo Aucella
Pamela Raggi
Carmen Marciano
Rita Perna
Matteo Bassetti
Antonio Di Biagio
Maurizio Sanguinetti
Luca Masucci
Serafina Valente
Marco Mandalà
Alessia Giorli
Lorenzo Salerni
Patrizia Zucchi
Pierpaolo Parravicini
Elisabetta Menatti
Tullio Trotta
Ferdinando Giannattasio
Gabriella Coiro
Fabio Lena
Domenico A. Coviello
Cristina Mussini
Enrico Martinelli
Sandro Mancarella
Luisa Tavecchia
Lia Crotti
Chiara Gabbi
Marco Rizzi
Franco Maggiolo
Diego Ripamonti
Tiziana Bachetti
Maria Teresa La Rovere
Simona Sarzi-Braga
Maurizio Bussotti
Stefano Ceri
Pietro Pinoli
Francesco Raimondi
Filippo Biscarini
Alessandra Stella
Kristina Zguro
Katia Capitani
Claudia Suardi
Simona Dei
Gianfranco Parati
Sabrina Ravaglia
Rosangela Artuso
Giordano Bottà
Paolo Di Domenico
Ilaria Rancan
Antonio Perrella
Francesco Bianchi
Davide Romani
Paola Bergomi
Emanuele Catena
Riccardo Colombo
Marco Tanfoni
Antonella Vincenti
Claudio Ferri
Davide Grassi
Gloria Pessina
Mario Tumbarello
Massimo Di Pietro
Ravaglia Sabrina
Sauro Luchi
Chiara Barbieri
Donatella Acquilini
Elena Andreucci
Francesco Vladimiro Segala
Giusy Tiseo
Marco Falcone
Mirjam Lista
Monica Poscente
Oreste De Vivo
Paola Petrocelli
Alessandra Guarnaccia
Silvia Baroni
Albert V. Smith
Andrew P. Boughton
Kevin W. Li
Jonathon LeFaive
Aubrey Annis
Anne E. Justice
Tooraj Mirshahi
Geetha Chittoor
Navya Shilpa Josyula
Jack A. Kosmicki
Manuel A. R. Ferreira
Joseph B. Leader
Dave J. Carey
Matthew C. Gass
Julie E. Horowitz
Michael N. Cantor
Ashish Yadav
Aris Baras
Goncalo R. Abecasis
David A. van Heel
Karen A. Hunt
Dan Mason
Qin Qin Huang
Sarah Finer
Bhavi Trivedi
Christopher J. Griffiths
Hilary C. Martin
John Wright
Richard C. Trembath
Nicole Soranzo
Jing Hua Zhao
Adam S. Butterworth
John Danesh
Emanuele Di Angelantonio
Lude Franke
Marike Boezen
Patrick Deelen
Annique Claringbould
Esteban Lopera
Robert Warmerdam
Judith M. Vonk
Irene van Blokland
Pauline Lanting
Anil P. S. Ori
Sebastian Zöllner
Jiongming Wang
Andrew Beck
Gina Peloso
Yuk-Lam Ho
Yan V. Sun
Jennifer E. Huffman
Christopher J. O’Donnell
Kelly Cho
Phil Tsao
J. Michael Gaziano
Michel Nivard
Eco de Geus
Meike Bartels
Jouke Jan Hottenga
Scott T. Weiss
Elizabeth W. Karlson
Jordan W. Smoller
Robert C. Green
Yen-Chen Anne Feng
Josep Mercader
Shawn N. Murphy
James B. Meigs
Ann E. Woolley
Emma F. Perez
Daniel Rader
Anurag Verma
Marylyn D. Ritchie
Binglan Li
Shefali S. Verma
Anastasia Lucas
Yuki Bradford
Hugo Zeberg
Robert Frithiof
Michael Hultström
Miklos Lipcsey
Lindo Nkambul
Nicolas Tardif
Olav Rooyackers
Jonathan Grip
Tomislav Maricic
Konrad J. Karczewski
Elizabeth G. Atkinson
Kristin Tsuo
Nikolas Baya
Patrick Turley
Rahul Gupta
Shawneequa Callier
Raymond K. Walters
Duncan S. Palmer
Gopal Sarma
Nathan Cheng
Wenhan Lu
Sam Bryant
Claire Churchhouse
Caroline Cusick
Jacqueline I. Goldstein
Daniel King
Cotton Seed
Hilary Finucane
Alicia R. Martin
F. Kyle Satterstrom
Daniel J. Wilson
Jacob Armstrong
Justine K. Rudkin
Gavin Band
Sarah G. Earle
Shang-Kuan Lin
Nicolas Arning
Derrick W. Crook
David H. Wyllie
Anne Marie O’Connell
Chris C. A. Spencer
Nils Koelling
Mark J. Caulfield
Richard H. Scott
Tom Fowler
Loukas Moutsianas
Athanasios Kousathanas
Dorota Pasko
Susan Walker
Augusto Rendon
Alex Stuckey
Christopher A. Odhams
Daniel Rhodes
Georgia Chan
Prabhu Arumugam
Catherine A. Ball
Eurie L. Hong
Kristin Rand
Ahna Girshick
Harendra Guturu
Asher Haug Baltzell
Genevieve Roberts
Danny Park
Marie Coignet
Shannon McCurdy
Spencer Knight
Raghavendran Partha
Brooke Rhead
Miao Zhang
Nathan Berkowitz
Michael Gaddis
Keith Noto
Luong Ruiz
Milos Pavlovic
Laura G. Sloofman
Alexander W. Charney
Noam D. Beckmann
Eric E. Schadt
Daniel M. Jordan
Ryan C. Thompson
Kyle Gettler
Noura S. Abul-Husn
Steven Ascolillo
Joseph D. Buxbaum
Kumardeep Chaudhary
Judy H. Cho
Yuval Itan
Eimear E. Kenny
Gillian M. Belbin
Stuart C. Sealfon
Robert P. Sebra
Irene Salib
Brett L. Collins
Tess Levy
Bari Britvan
Katherine Keller
Lara Tang
Michael Peruggia
Liam L. Hiester
Kristi Niblo
Alexandra Aksentijevich
Alexander Labkowsky
Avromie Karp
Menachem Zlatopolsky
Michael Preuss
Ruth J. F. Loos
Girish N. Nadkarni
Ron Do
Clive Hoggart
Sam Choi
Slayton J. Underwood
Paul O’Reilly
Laura M. Huckins
Marissa Zyndorf
Mark J. Daly
Benjamin M. Neale
Andrea Ganna

## Sheet: Gen-COVID (Italy)
Investigators of the GEN-COVID cohort
First Name	Last Name	Email Address	Institution	City	Country
Alessandra	Renieri	alessandra.renieri@unisi.it	Medical Genetics, University of Siena, Italy; Genetica Medica, Azienda Ospedaliero-Universitaria Senese, Italy; Med Biotech Hub and Competence Center, Department of Medical Biotechnologies, University of Siena	Siena	Italy
Francesca	Mari	francesca.mari@unisi.it	Medical Genetics, University of Siena, Italy; Genetica Medica, Azienda Ospedaliero-Universitaria Senese, Italy; Med Biotech Hub and Competence Center, Department of Medical Biotechnologies, University of Siena	Siena	Italy
Chiara	Fallerini	fallerini2@unisi.it	Medical Genetics, University of Siena, Italy; Med Biotech Hub and Competence Center, Department of Medical Biotechnologies, University of Siena	Siena	Italy
Sergio	Daga	sergio.daga@dbm.unisi.it	Medical Genetics, University of Siena, Italy; Med Biotech Hub and Competence Center, Department of Medical Biotechnologies, University of Siena	Siena	Italy
Margherita	Baldassarri	margherita.baldassarri@dbm.unisi.it	Medical Genetics, University of Siena, Italy; Med Biotech Hub and Competence Center, Department of Medical Biotechnologies, University of Siena	Siena	Italy
Francesca	Fava	francesca.fava@dbm.unisi.it	Medical Genetics, University of Siena, Italy; Genetica Medica, Azienda Ospedaliero-Universitaria Senese, Italy; Med Biotech Hub and Competence Center, Department of Medical Biotechnologies, University of Siena	Siena	Italy
Elisa	Frullanti	elisa.frullanti@dbm.unisi.it	Medical Genetics, University of Siena, Italy; Med Biotech Hub and Competence Center, Department of Medical Biotechnologies, University of Siena	Siena	Italy
Gabriella	Doddato	gabriella.doddato@dbm.unisi.it	Medical Genetics, University of Siena, Italy; Med Biotech Hub and Competence Center, Department of Medical Biotechnologies, University of Siena	Siena	Italy
Rossella	Tita	rossella.tita@dbm.unisi.it	Genetica Medica, Azienda Ospedaliero-Universitaria Senese, Italy	Siena	Italy
Mirella	Bruttini	mirella.bruttini@dbm.unisi.it	Medical Genetics, University of Siena, Italy; Med Biotech Hub and Competence Center, Department of Medical Biotechnologies, University of Siena, Italy; Genetica Medica, Azienda Ospedaliero-Universitaria Senese	Siena	Italy
Susanna	Croci	susanna.croci@dbm.unisi.it	Medical Genetics, University of Siena, Italy; Med Biotech Hub and Competence Center, Department of Medical Biotechnologies, University of Siena	Siena	Italy
Ilaria	Meloni	ilaria.meloni@dbm.unisi.it	Medical Genetics, University of Siena, Italy; Med Biotech Hub and Competence Center, Department of Medical Biotechnologies, University of Siena	Siena	Italy
Laura	Di Sarno	laura.disarno@dbm.unisi.it	Medical Genetics, University of Siena, Italy; Med Biotech Hub and Competence Center, Department of Medical Biotechnologies, University of Siena	Siena	Italy
Giada	Beligni	giada.beligni@dbm.unisi.it	Medical Genetics, University of Siena, Italy; Med Biotech Hub and Competence Center, Department of Medical Biotechnologies, University of Siena	Siena	Italy
Maria	Palmieri	maria.palmieri@dbm.unisi.it	Medical Genetics, University of Siena, Italy; Med Biotech Hub and Competence Center, Department of Medical Biotechnologies, University of Siena	Siena	Italy
Mirjam	Lista	mirjam.lista@dbm.unisi.it	Medical Genetics, University of Siena, Italy; Med Biotech Hub and Competence Center, Department of Medical Biotechnologies, University of Siena	Siena	Italy
Ludovica	Mercuri	ludovica.mercuri@student.unisi.it	Medical Genetics, University of Siena, Italy; Med Biotech Hub and Competence Center, Department of Medical Biotechnologies, University of Siena	Siena	Italy
Elena	Pasquinelli	e.pasquinelli1@student.unisi.it	Medical Genetics, University of Siena, Italy; Med Biotech Hub and Competence Center, Department of Medical Biotechnologies, University of Siena	Siena	Italy
Debora	Maffeo	d.maffeo@student.unisi.it	Medical Genetics, University of Siena, Italy; Med Biotech Hub and Competence Center, Department of Medical Biotechnologies, University of Siena	Siena	Italy
Anna Maria	Pinto	annamaria.pinto@dbm.unisi.it	Genetica Medica, Azienda Ospedaliero-Universitaria Senese	Siena	Italy
Maria Antonietta	Mencarelli	mariaantonietta.mencarelli@dbm.unisi.it	Genetica Medica, Azienda Ospedaliero-Universitaria Senese	Siena	Italy
Caterina	Lo Rizzo	lorizzo2@unisi.it	Genetica Medica, Azienda Ospedaliero-Universitaria Senese	Siena	Italy
Francesca	Ariani	ariani2@unisi.it	Med Biotech Hub and Competence Center, Department of Medical Biotechnologies, University of Siena;Medical Genetics, University of Siena; Genetica Medica, Azienda Ospedaliero-Universitaria Senese	Siena	Italy
Chiara	Gabbi	chiara917@gmail.com	Department of Biosciences and Nutrition, Karolinska Institutet, Stockholm, Sweden	Milan	Italy
Simone	Furini	simone.furini@unisi.it	Med Biotech Hub and Competence Center, Department of Medical Biotechnologies, University of Siena, Italy	Siena	Italy
Nicola	Picchiotti	nicola.picchiotti@gmail.com	Department of Mathematics, University of Pavia, Pavia, Italy; University of Siena, DIISM-SAILAB, Siena, Italy	Pavia, Siena	Italy
Marco	Gori	marco.gori@unisi.it	University of Siena, DIISM-SAILAB; Université Côte d’Azur, Inria, CNRS, I3S, Maasai	Siena	Italy
Maurizio	Sanarico	maurizio.sanarico@gmail.com	Independent Data Scientist	Milan	Italy
Francesca	Montagnani	francesca.montagnani@unisi.it	Med Biotech Hub and Competence Center, Department of Medical Biotechnologies, University of Siena, Italy; Dept of Medical Sciences, Infectious and Tropical Diseases Unit, Azienda Ospedaliera Universitaria Senese, Siena, Italy	Siena	Italy
Mario	Tumbarello	mario.tumbarello@unisi.it	Med Biotech Hub and Competence Center, Department of Medical Biotechnologies, University of Siena; Dept of Medical Sciences, Infectious and Tropical Diseases Unit, Azienda Ospedaliera Universitaria Senese	Siena	Italy
Ilaria	Rancan	rancan.ilaria@gmail.com	Med Biotech Hub and Competence Center, Department of Medical Biotechnologies, University of Siena; Dept of Medical Sciences, Infectious and Tropical Diseases Unit, Azienda Ospedaliera Universitaria Senese	Siena	Italy
Massimiliano	Fabbiani	massimiliano.fabbiani@gmail.com	Departiment of Specialized and Internal Medicine, Infectious and Tropical Diseases Unit, Azienda Ospedaliera Universitaria Senese	Siena	Italy
Elena	Bargagli	bargagli2@gmail.com	Unit of Respiratory Diseases and Lung Transplantation, Department of Internal and Specialist Medicine, University of Siena	Siena	Italy
Laura	Bergantini	laurabergantini@gmail.com	Unit of Respiratory Diseases and Lung Transplantation, Department of Internal and Specialist Medicine, University of Siena	Siena	Italy
Miriana	D'Alessandro	dalessandro.miriana@gmail.com	Unit of Respiratory Diseases and Lung Transplantation, Department of Internal and Specialist Medicine, University of Siena	Siena	Italy
Paolo	Cameli	paolo.cameli@ao-siena.toscana.it	Unit of Respiratory Diseases and Lung Transplantation, Department of Internal and Specialist Medicine, University of Siena	Siena	Italy
David	Bennett	david.bennett@ao-siena.toscana.it	Unit of Respiratory Diseases and Lung Transplantation, Department of Internal and Specialist Medicine, University of Siena	Siena	Italy
Federico	Anedda	federico.anedda@dbm.unisi.it	Dept of Emergency and Urgency, Medicine, Surgery and Neurosciences, Unit of Intensive Care Medicine, Siena University Hospital	Siena	Italy
Simona	Marcantonio	simona.marcantonio@dbm.unisi.it	Dept of Emergency and Urgency, Medicine, Surgery and Neurosciences, Unit of Intensive Care Medicine, Siena University Hospital	Siena	Italy
Sabino	Scolletta	sabino.scolletta@dbm.unisi.it	Dept of Emergency and Urgency, Medicine, Surgery and Neurosciences, Unit of Intensive Care Medicine, Siena University Hospital	Siena	Italy
Federico	Franchi	federico.franchi@dbm.unisi.it	Dept of Emergency and Urgency, Medicine, Surgery and Neurosciences, Unit of Intensive Care Medicine, Siena University Hospital	Siena	Italy
Maria Antonietta	Mazzei	mariaantonietta.mazzei@unisi.it	Department of Medical, Surgical and Neuro Sciences and Radiological Sciences, Unit of Diagnostic Imaging, University of Siena	Siena	Italy
Susanna	Guerrini	guerrinisus@gmail.com	Department of Medical, Surgical and Neuro Sciences and Radiological Sciences, Unit of Diagnostic Imaging, University of Siena	Siena	Italy
Edoardo	Conticini	conticini.edoardo@gmail.com	Rheumatology Unit, Department of Medicine, Surgery and Neurosciences, University of Siena, Policlinico Le Scotte	Siena	Italy
Luca	Cantarini	cantarini@unisi.it	Rheumatology Unit, Department of Medicine, Surgery and Neurosciences, University of Siena, Policlinico Le Scotte	Siena	Italy
Bruno	Frediani	bruno.frediani@unisi.it	Rheumatology Unit, Department of Medicine, Surgery and Neurosciences, University of Siena, Policlinico Le Scotte	Siena	Italy
Danilo	Tacconi	danilo.tacconi@uslsudest.toscana.it	Department of Specialized and Internal Medicine, Infectious Diseases Unit, San Donato Hospital	Arezzo	Italy
Chiara	Spertilli Raffaelli	chiara.spertilliraffaelli@uslsudest.toscana.it	Department of Specialized and Internal Medicine, Infectious Diseases Unit, San Donato Hospital	Arezzo	Italy
Marco	Feri	marco.feri@uslsudest.toscana.it	Dept of Emergency, Anesthesia Unit, San Donato Hospital	Arezzo	Italy
Alice	Donati	alice.donati@uslsudest.toscana.it	Dept of Emergency, Anesthesia Unit, San Donato Hospital	Arezzo	Italy
Raffaele	Scala	raffaele.scala@uslsudest.toscana.it	Department of Specialized and Internal Medicine, Pneumology Unit and UTIP, San Donato Hospital	Arezzo	Italy
Luca	Guidelli	guidelliluca6@gmail.com	Department of Specialized and Internal Medicine, Pneumology Unit and UTIP, San Donato Hospital	Arezzo	Italy
Genni	Spargi	genni.spargi@uslsudest.toscana.it	Department of Emergency, Anesthesia Unit, Misericordia Hospital	Grosseto	Italy
Marta	Corridi	marta.corridi@uslsudest.toscana.it	Department of Emergency, Anesthesia Unit, Misericordia Hospital	Grosseto	Italy
Cesira	Nencioni	cesira.nencioni@uslsudest.toscana.it	Department of Specialized and Internal Medicine, Infectious Diseases Unit, Misericordia Hospital	Grosseto	Italy
Leonardo	Croci	leonardo.croci@uslsudest.toscana.it	Department of Specialized and Internal Medicine, Infectious Diseases Unit, Misericordia Hospital	Grosseto	Italy
Gian Piero	Caldarelli	gianpiero.caldarelli@uslsudest.toscana.it	Clinical Chemical Analysis Laboratory, Misericordia Hospital	Grosseto	Italy
Paolo	Piacentini	paolo.piacentini@uslsudest.toscana.it	Department of Preventive Medicine, Azienda USL Toscana Sud Est	Grosseto	Italy
Maria	Bandini	maria.bandini@uslsudest.toscana.it	Department of Preventive Medicine, Azienda USL Toscana Sud Est	Grosseto	Italy
Elena	Desanctis	elena.desanctis@uslsudest.toscana.it	Department of Preventive Medicine, Azienda USL Toscana Sud Est	Grosseto	Italy
Silvia	Cappelli	silvia.cappelli@uslsudest.toscana.it	Department of Preventive Medicine, Azienda USL Toscana Sud Est	Grosseto	Italy
Anna	Canaccini	anna.canaccini@uslsudest.toscana.it	Territorial Scientific Technician Department, Azienda USL Toscana Sud Est	Grosseto	Italy
Agnese	Verzuri	agnese.verzuri@uslsudest.toscana.it	Territorial Scientific Technician Department, Azienda USL Toscana Sud Est	Grosseto	Italy
Valentina	Anemoli	valentina.anemoli@uslsudest.toscana.it	Territorial Scientific Technician Department, Azienda USL Toscana Sud Est	Grosseto	Italy
Agostino	Ognibene	agostino.ognibene@uslsudest.toscana.it	Laboratory Medicine Department, San Donato Hospital	Arezzo	Italy
Alessando	Pancrazzi	alessandro.pancrazzi@uslsudest.toscana.it	Laboratory Medicine Department, San Donato Hospital	Arezzo	Italy
Maria	Lorubbio	maria.lorubbio@uslsudest.toscana.it	Laboratory Medicine Department, San Donato Hospital	Arezzo	Italy
Massimo	Vaghi	vaghim@yahoo.it	Chirurgia Vascolare, Ospedale Maggiore di Crema	Crema	Italy
Antonella	D'Arminio Monforte	antonella.darminio@unimi.it	Department of Health Sciences, Clinic of Infectious Diseases, ASST Santi Paolo e Carlo, University of Milan	Milan	Italy
Federica Gaia	Miraglia	federicamiraglia0@gmail.com	Department of Health Sciences, Clinic of Infectious Diseases, ASST Santi Paolo e Carlo, University of Milan	Milan	Italy
Stefania	Mantovani	s.mantovani@smatteo.pv.it	Division of Clinical Immunology - Infectious Diseases, Department of Medicine, Fondazione IRCCS Policlinico San Matteo, Pavia, Italy	Pavia	Italy
Mario Umberto	Mondelli	marioumberto.mondelli@unipv.it	Division of Infectious Diseases and Immunology, Department of Medical Sciences and Infectious Diseases, Fondazione IRCCS Policlinico San Matteo, Pavia, Italy; Department of Internal Medicine and Therapeutics, University of Pavia, Italy	Pavia	Italy
Raffaele	Bruno	r.bruno@smatteo.pv.it	Division of Infectious Diseases and Immunology, Department of Medical Sciences and Infectious Diseases, Fondazione IRCCS Policlinico San Matteo; Department of Internal Medicine and Therapeutics, University of Pavia	Pavia	Italy
Marco	Vecchia	m.vecchia@smatteo.pv.it	Division of Infectious Diseases I, Fondazione IRCCS Policlinico San Matteo	Pavia	Italy
Serena	Ludovisi	serena.ludovisi@unipv.it	Fondazione IRCCS Ca’ Granda Ospedale Maggiore Policlinico	Milan	Italy
Massimo	Girardis	girardis@unimore.it	Department of Anesthesia and Intensive Care, University of Modena and Reggio Emilia	Modena	Italy
Sophie	Venturelli	sophieventurelli11@gmail.com	Department of Anesthesia and Intensive Care, University of Modena and Reggio Emilia	Modena	Italy
Andrea	Cossarizza	andrea.cossarizza@unimore.it	Department of Medical and Surgical Sciences for Children and Adults, University of Modena and Reggio Emilia	Modena	Italy
Andrea	Antinori	andrea.antinori@inmi.it	HIV/AIDS Department, National Institute for Infectious Diseases, IRCCS, Lazzaro Spallanzani	Rome	Italy
Alessandra	Vergori	alessandra.vergori@inmi.it	HIV/AIDS Department, National Institute for Infectious Diseases, IRCCS, Lazzaro Spallanzani	Rome	Italy
Arianna	Emioliozzi	ariannaemiliozzi@gmail.com	HIV/AIDS Department, National Institute for Infectious Diseases, IRCCS, Lazzaro Spallanzani	Rome	Italy
Stefano	Rusconi	stefano.rusconi@unimi.it	III Infectious Diseases Unit, ASST-FBF-Sacco; Department of Biomedical and Clinical Sciences Luigi Sacco, University of Milan	Milan	Italy
Matteo	Siano	matteosiano2@gmail.com	Department of Biomedical and Clinical Sciences Luigi Sacco, University of Milan	Milan	Italy
Arianna	Gabrieli	ary1671982@gmail.com	Department of Biomedical and Clinical Sciences Luigi Sacco, University of Milan	Milan	Italy
Agostino	Riva	agostino.riva@unimi.it	III Infectious Diseases Unit, ASST-FBF-Sacco; Department of Biomedical and Clinical Sciences Luigi Sacco, University of Milan	Milan	Italy
Daniela	Francisci	daniela.francisci@unipg.it	Infectious Diseases Clinic, Department of Medicine 2, Azienda Ospedaliera di Perugia and University of Perugia, Santa Maria Hospital; Infectious Diseases Clinic, "Santa Maria" Hospital, University of Perugia	Perugia	Italy
Elisabetta	Schiaroli	elisabetta.schiaroli@unipg.it	Infectious Diseases Clinic, Department of Medicine 2, Azienda Ospedaliera di Perugia and University of Perugia, Santa Maria Hospital; Infectious Diseases Clinic, "Santa Maria" Hospital, University of Perugia	Perugia	Italy
Francesco	Paciosi	francescopaciosi@gmail.com	Infectious Diseases Clinic, "Santa Maria" Hospital, University of Perugia	Perugia	Italy
Pier Giorgio	Scotton	piergiorgio.scotton@aulss2.veneto.it	Department of Infectious Diseases, Treviso Hospital, Local Health Unit 2 Marca Trevigiana	Treviso	Italy
Francesca	Andretta	francesca.andretta@gmail.com	Department of Infectious Diseases, Treviso Hospital, Local Health Unit 2 Marca Trevigiana	Treviso	Italy
Sandro	Panese	sandro.panese@aulss3.veneto.it	Clinical Infectious Diseases, Mestre Hospital	Venice	Italy
Renzo	Scaggiante	renzo.scaggiante@aulss1.veneto.it	Infectious Diseases Clinic, ULSS1	Belluno	Italy
Francesca	Gatti	francesca.gatti@asst-garda.it	Infectious Diseases Clinic, ULSS1	Belluno	Italy
Saverio	Parisi	saverio.parisi@unipd.it	Department of Molecular Medicine, University of Padova	Padova	Italy
Melania	Degli Antoni	m.degliantoni@unibs.it	Department of Infectious and Tropical Diseases, University of Brescia and ASST Spedali Civili Hospital	Brescia	Italy
Isabella	Zanella	isabella.zanella@unibs.it	Department of Molecular and Translational Medicine, University of Brescia; Clinical Chemistry Laboratory, Cytogenetics and Molecular Genetics Section, Diagnostic Department, ASST Spedali Civili di Brescia	Brescia	Italy
Coppola	Ciro		RUP Covid Direzione Medica di Presidio A.O.R.N. "Antonio Cardarelli"	Naples	Italy
Carmelo	Piscopo	carmelo.piscopo@aocardarelli.it	Medical Genetics and Laboratory of Medical Genetics Unit, A.O.R.N. "Antonio Cardarelli"	Naples	Italy
Mario	Capasso	mario.capasso@unina.it	Department of Molecular Medicine and Medical Biotechnology, University of Naples Federico II; CEINGE Biotecnologie Avanzate; IRCCS SDN	Naples	Italy
Roberta	Russo	russola83@gmail.com	Department of Molecular Medicine and Medical Biotechnology, University of Naples Federico II; CEINGE Biotecnologie Avanzate	Naples	Italy
Immacolata	Andolfo	immandolfo@gmail.com	Department of Molecular Medicine and Medical Biotechnology, University of Naples Federico II; CEINGE Biotecnologie Avanzate	Naples	Italy
Achille	Iolascon	achille.iolascon@gmail.com	Department of Molecular Medicine and Medical Biotechnology, University of Naples Federico II; CEINGE Biotecnologie Avanzate	Naples	Italy
Giuseppe	Fiorentino	giuseppe.fiorentino@ospedalideicolli.it	Unit of Respiratory Physiopathology, AORN dei Colli, Monaldi Hospital	Naples	Italy
Massimo	Carella	m.carella@operapadrepio.it	Division of Medical Genetics, Fondazione IRCCS Casa Sollievo della Sofferenza Hospital	San Giovanni Rotondo	Italy
Marco	Castori	m.castori@operapadrepio.it	Division of Medical Genetics, Fondazione IRCCS Casa Sollievo della Sofferenza Hospital	San Giovanni Rotondo	Italy
Filippo	Aucella	f.aucella@operapadrepio.it	Department of Medical Sciences, Fondazione IRCCS Casa Sollievo della Sofferenza Hospital	San Giovanni Rotondo	Italy
Pamela	Raggi	p.raggi@operapadrepio.it	Clinical Trial Office, Fondazione IRCCS Casa Sollievo della Sofferenza Hospital	San Giovanni Rotondo	Italy
Rita	Perna	r.perna@operapadrepio.it	Clinical Trial Office, Fondazione IRCCS Casa Sollievo della Sofferenza Hospital	San Giovanni Rotondo	Italy
Matteo	Bassetti	matteo.bassetti@hsanmartino.it	Department of Health Sciences, University of Genova; Infectious Diseases Clinic, Policlinico San Martino Hospital, IRCCS for Cancer Research	Genoa	Italy
Antonio	Di Biagio	adibiagioa@gmail.com	Department of Health Sciences, University of Genova; Infectious Diseases Clinic, Policlinico San Martino Hospital, IRCCS for Cancer Research	Genoa	Italy
Maurizio	Sanguinetti	maurizio.sanguinetti@policlinicogemelli.it	Microbiology, Fondazione Policlinico Universitario Agostino Gemelli IRCCS, Catholic University of Medicine; Department of Laboratory Sciences and Infectious Diseases, Fondazione Policlinico Universitario A. Gemelli IRCCS	Rome	Italy
Luca	Masucci	luca.masucci@policlinicogemelli.it	Microbiology, Fondazione Policlinico Universitario Agostino Gemelli IRCCS, Catholic University of Medicine; Department of Laboratory Sciences and Infectious Diseases, Fondazione Policlinico Universitario A. Gemelli IRCCS	Rome	Italy
Serafina	Valente	serafina.valente@ao-siena.toscana.it	Department of Cardiovascular Diseases, University of Siena	Siena	Italy
Marco	Mandalà	m.mandala@ao-siena.toscana.it	Otolaryngology Unit, University of Siena	Siena	Italy
Alessia	Giorli	alessiagiorli.md@gmail.com	Otolaryngology Unit, University of Siena	Siena	Italy
Lorenzo	Salerni	lorenzo.salerni@unisi.it	Otolaryngology Unit, University of Siena	Siena	Italy
Patrizia	Zucchi	patrizia.zucchi@asst-val.it	Department of Internal Medicine, ASST Valtellina e Alto Lario	Sondrio	Italy
Pierpaolo	Parravicini	pierpaolo.parravicini@asst-val.it	Department of Internal Medicine, ASST Valtellina e Alto Lario	Sondrio	Italy
Elisabetta	Menatti	elisabetta.menatti@asst-val.it	Study Coordinator Oncologia Medica e Ufficio Flussi	Sondrio	Italy
Stefano	Baratti	stefano.baratti@studenti.unipd.it	Clinical Infectious Diseases, Mestre Hospital	Venice	Italy
Tullio	Trotta	tullio.trotta@tim.it	First Aid Department, Luigi Curto Hospital	Salerno	Italy
Ferdinando	Giannattasio	fgiannattasio@alice.it	First Aid Department, Luigi Curto Hospital	Salerno	Italy
Gabriella	Coiro	gabriella.coiro@gmail.com	First Aid Department, Luigi Curto Hospital	Salerno	Italy
Fabio	Lena	fabio.lena@uslsudest.toscana.it	Local Health Unit-Pharmaceutical Department of Grosseto, Toscana Sud Est Local Health Unit	Grosseto	Italy
Gianluca	Lacerenza	gianluca.lacerenza@uslsudest.toscana.it	Department of Pharmaceutical Medicine, Misericordia Hospital	Grosseto	Italy
Cristina	Mussini	cristina.mussini@unimore.it	Infectious Diseases Clinics, University of Modena and Reggio Emilia	Modena	Italy
Enrico	Martinelli	enrico.martinelli@asst-cremona.it	Department of Respiratory Diseases, Azienda Ospedaliera di Cremona	Cremona	Italy
Luisa	Tavecchia	luisa.tavecchia@asst-nordmilano.it	U.O.C. Medicina, ASST Nord Milano, Ospedale Bassini	Cinisello Balsamo	Italy
Lia	Crotti	l.crotti@auxologico.it	Istituto Auxologico Italiano, IRCCS, Department of Cardiovascular, Neural and Metabolic Sciences, San Luca Hospital; Department of Medicine and Surgery, University of Milano-Bicocca; Istituto Auxologico Italiano, IRCCS, Center for Cardiac Arrhythmias of Genetic Origin; Istituto Auxologico Italiano, IRCCS, Laboratory of Cardiovascular Genetics; Member of the European Reference Network for Rare, Lo…	Milan	Italy
Gianfranco	Parati	gianfranco.parati@unimib.it	Istituto Auxologico Italiano, IRCCS, Department of Cardiovascular, Neural and Metabolic Sciences, San Luca Hospital; Department of Medicine and Surgery, University of Milano-Bicocca;	Milan	Italy
Francesco	Raimondi	francesco.raimondi@sns.it	Laboratorio di Biologia Bio@SNS, Scuola Normale Superiore, Pisa, Italy	Pisa	Italy
Filippo	Biscarini	biscarini@ibba.cnr.it	CNR-Consiglio Nazionale delle Ricerche, Istituto di Biologia e Biotecnologia Agraria (IBBA)	Milan	Italy
Alessandra	Stella	stella@ibba.cnr.it	CNR-Consiglio Nazionale delle Ricerche, Istituto di Biologia e Biotecnologia Agraria (IBBA)	Milan	Italy
Tiziana	Bachetti	tiziana.bachetti@icsmaugeri.it	Direzione Scientifica, Istituti Clinici Scientifici Maugeri IRCCS	Pavia	Italy
Maria Teresa	La Rovere	mariateresa.larovere@icsmaugeri.it	Istituti Clinici Scientifici Maugeri IRCCS, Department of Cardiology, Institute of Montescano	Pavia	Italy
Maurizio	Bussotti	maurizio.bussotti@icsmaugeri.it	Istituti Clinici Scientifici Maugeri IRCCS, Department of Cardiology, Institute of Milan	Milan	Italy
Katia	Capitani	katia.capitani@dbm.unisi.it	Core Research Laboratory, ISPRO; Med Biotech Hub and Competence Center, Department of Medical Biotechnologies, University of Siena	Florence	Italy
Kristina	Zguro	kristina.zguro@student.unisi.it	Med Biotech Hub and Competence Center, Department of Medical Biotechnologies, University of Siena	Siena	Italy
Giulia	Brunelli	brunelli.giulia.1@gmail.com	Med Biotech Hub and Competence Center, Department of Medical Biotechnologies, University of Siena	Siena	Italy
Simona	Dei	simona.dei@uslsudest.toscana.it	Health Management, Azienda USL Toscana Sudest	Siena	Italy
Sabrina	Ravaglia	sabrina.ravaglia@mondino.it	IRCCS C. Mondino Foundation	Pavia	Italy
Rosangela	Artuso	r.artuso@meyer.it	Medical Genetics Unit, Meyer Children's University Hospital	Florence	Italy
Antonio	Perrella	antonio.perrella@uslsudest.toscana.it	Department of Medicine, Pneumology Unit, Misericordia Hospital	Grosseto	Italy
Francesco	Bianchi	bianchi66@student.unisi.it	Department of Medicine, Pneumology Unit, Misericordia Hospital; Med Biotech Hub and Competence Center, Department of Medical Biotechnologies, University of Siena, Italy.	Siena	Italy
Giuseppe	Merla	g.merla@operapadrepio.it	Department of Molecular Medicine and Medical Biotechnology, University of Naples Federico II; Laboratory of Regulatory and Functional Genomics, Fondazione IRCCS Casa Sollievo della Sofferenza	San Giovanni Rotondo	Italy
Gabriella Maria	Squeo	g.squeo@operapadrepio.it	Laboratory of Regulatory and Functional Genomics, Fondazione IRCCS Casa Sollievo della Sofferenza	San Giovanni Rotondo	Italy
Davide	Romani	davide.romani@uslsudest.toscana.it	Department of Preventive Medicine, Azienda USL Toscana Sud Est	Grosseto	Italy
Manola	Pisani	manola.pisani@uslsudest.toscana.it	Dipartimento Tecnico-Scientifico Territoriale, Azienda USL Toscana Sud Est	Grosseto	Italy
Stefano	Busani	stefano.busani@unimore.it	Department of Anesthesia and Intensive Care, University of Modena and Reggio Emilia	Modena	Italy
Andrea	Tommasi	andrea.tommasi@studenti.unipg.it	Infectious Diseases Clinic, Department of Medicine 2, Azienda Ospedaliera di Perugia and University of Perugia, Santa Maria Hospital	Perugia	Italy
Francesco	Castelli	francesco.castelli@unibs.it	Department of Infectious and Tropical Diseases, University of Brescia and ASST Spedali Civili Hospital	Brescia	Italy
Eugenia	Quiros-Roldan	maria.quirosroldan@unibs.it	Department of Infectious and Tropical Diseases, University of Brescia and ASST Spedali Civili Hospital	Brescia	Italy
Alessandra	Guarnaccia	aguarnaccia.bio@gmail.com	Microbiology, Fondazione Policlinico Universitario Agostino Gemelli IRCCS, Catholic University of Medicine	Rome	Italy
Annarita	Giliberti	annarita.giliberti@meyer.it	Medical Genetics Unit, Meyer Children's University Hospital	Firenze	Italy
Elena	Andreucci	elena.andreucci@meyer.it	Medical Genetics Unit, Meyer Children's University Hospital	Florence	italy
Giulia	Gori	giulia.gori@meyer.it	Medical Genetics Unit, Meyer Children's University Hospital	Florence	italy
Angelica	Pagliazzi	paglazzi.angelica@gmail.com	Medical Genetics Unit, Meyer Children's University Hospital	Florence	italy
Erika	Fiorentini	erika.fiorentini@meyer.it	Medical Genetics Unit, Meyer Children's University Hospital	Florence	italy
Paola	Bergomi	paola.bergomi@asst-fbf-sacco.it	Department of Anesthesia and Intensive Care Unit, ASST Fatebenefratelli Sacco, Luigi Sacco Hospital, Polo Universitario, University of Milan	Milan	Italy
Emanuele	Catena	emanuele.catena@asst-fbf-sacco.it	Department of Anesthesia and Intensive Care Unit, ASST Fatebenefratelli Sacco, Luigi Sacco Hospital, Polo Universitario, University of Milan	Milan	Italy
Riccardo	Colombo	riccardo.colombo@asst-fbf-sacco.it	Department of Anesthesia and Intensive Care Unit, ASST Fatebenefratelli Sacco, Luigi Sacco Hospital, Polo Universitario, University of Milan	Milan	Italy
Sauro	Luchi	sauro.luchi@uslnordovest.toscana.it	Infectious Disease Unit, Hospital of Lucca	Lucca	Italy
Giovanna	Morelli	giovanna.morelli@uslnordovest.toscana.it	Infectious Disease Unit, Hospital of Lucca	Lucca	Italy
Paola	Petrocelli	paola.petrocelli@uslnordovest.toscana.it	Infectious Disease Unit, Hospital of Lucca	Lucca	Italy
Sarah	Iacopini	sarah.iacopini@uslnordovest.toscana.it	Infectious Disease Unit, Hospital of Lucca	Lucca	Italy
Sara	Modica	sara.modica@uslnordovest.toscana.it	Infectious Disease Unit, Hospital of Lucca	Lucca	Italy
Silvia	Baroni	silvia.baroni@policlinicogemelli.it	Department of Diagnostic and Laboratory Medicine, Institute of Biochemistry and Clinical Biochemistry, Fondazione Policlinico Universitario A. Gemelli IRCCS, Catholic University of the Sacred Heart	Rome	Italy
Francesco Vladimiro	Segala	francescovladimiro.segala@policlinicogemelli.it	Clinic of Infectious Diseases, Catholic University of the Sacred Heart	Rome	Italy
Marco	Falcone	marco.falcone@unipi.it	Department of Clinical and Experimental Medicine, Infectious Diseases Unit, University of Pisa	Pisa	Italy
Giusy	Tiseo	tiseogiusy@gmail.com	Department of Clinical and Experimental Medicine, Infectious Diseases Unit, University of Pisa	Pisa	Italy
Chiara	Barbieri	chiara.barbieri090@gmail.com	Department of Clinical and Experimental Medicine, Infectious Diseases Unit, University of Pisa	Pisa	Italy
Tommaso	Matucci	tommasomatucci91@gmail.com	Department of Clinical and Experimental Medicine, Infectious Diseases Unit, University of Pisa	Pisa	Italy
Davide	Grassi	davide.grassi@univaq.it	Department of Clinical Medicine, Public Health, Life and Environment Sciences, University of L'Aquila	L'Aquila	Italy
Claudio	Ferri	claudio.ferri@univaq.it	Department of Clinical Medicine, Public Health, Life and Environment Sciences, University of L'Aquila	L'Aquila	Italy
Franco	Marinangeli	franco.marinangeli@univaq.it	Anesthesiology and Intensive Care, University of L'Aquila	L'Aquila	Italy
Francesco	Brancati	francesco.brancati@univaq.it	Medical Genetics Unit, Department of Life, Health and Environmental Sciences, University of L'Aquila	L'Aquila	Italy
Antonella	Vincenti	antonella.vincenti@uslnordovest.toscana.it	Infectious Disease Unit, Hospital of Massa	Massa Carrara	Italy
Valentina	Borgo	valentina.borgo@uslnordovest.toscana.it	Infectious Disease Unit, Hospital of Massa	Massa Carrara	Italy
Stefania	Lombardi	stefania.lombardi@uslnordovest.toscana.it	Infectious Disease Unit, Hospital of Massa	Massa Carrara	Italy
Mirco	Lenzi	mirco.lenzi@uslnordovest.toscana.it	Infectious Disease Unit, Hospital of Massa	Massa Carrara	Italy
Massimo	Di Pietro	massimoantonio.dipietro@uslcentro.toscana.it	Unit of Infectious Diseases, S.M. Annunziata Hospital	Florence	Italy
Francesca	Vichi	francesca.vichi@uslnordovest.toscana.it	Unit of Infectious Diseases, S.M. Annunziata Hospital	Florence	Italy
Benedetta	Romanin	benedetta.romanin@gmail.com	Unit of Infectious Diseases, S.M. Annunziata Hospital	Florence	Italy
Letizia	Attala	letizia.attala@uslcentro.toscana.it	Unit of Infectious Diseases, S.M. Annunziata Hospital	Florence	Italy
Cecilia	Costa	cecilia.costa@uslnordovest.toscana.it	Unit of Infectious Diseases, S.M. Annunziata Hospital	Florence	Italy
Andrea	Gabbuti	andrea.gabbuti@uslnordovest.toscana.it	Unit of Infectious Diseases, S.M. Annunziata Hospital	Florence	Italy
Roberto	Menè	r.mene@campus.unimib.it	Istituto Auxologico Italiano, IRCCS, Department of Cardiovascular, Neural and Metabolic Sciences, San Luca Hospital; Department of Medicine and Surgery, University of Milano-Bicocca	Milan	Italy
Patrizia	Casprini	pcasprini@usl4.toscana.it	Laboratory of Clinical Pathology and Immunoallergy	Florence-Prato	Italy
Marcello	Maffezzoni	marcello.maffezzoni01@universitadipavia.it	University of Pavia	Pavia	Italy
Marta	Colaneri	m.colaneri@smatteo.pv.it	Division of Infectious Diseases I, Fondazione IRCCS Policlinico San Matteo	Pavia	Italy
Massimiliano	Esposito	massimiliano.esposito91@gmail.com	Department of Medical, Surgical and Advanced Technologies "G.F. Ingrassia", University of Catania	Catania	Italy
Cristoforo	Pomara	cristoforo.pomara@unict.it	Department of Medical, Surgical and Advanced Technologies "G.F. Ingrassia", University of Catania	Catania	Italy
Alex	Di Florio	alex.diflorio92@gmail.com	Department of Cardiovascular Diseases, University of Siena	Siena	Italy
Lucrezia	Galasso	lucrezia.galasso@dbm.unisi.it	Laboratorio Patologia Clinica, Azienda Ospedaliero-Universitaria Senese	Siena	Italy
Michele	Cirianni	michele.cirianni@dbm.unisi.it	Laboratorio Patologia Clinica, Azienda Ospedaliero-Universitaria Senese	Siena	Italy
Roberto	Leoncini	rob.leoncini@ao-siena.toscana.it	Med Biotech Hub and Competence Center, Department of Medical Biotechnologies, University of Siena; Laboratorio Patologia Clinica, Azienda Ospedaliero-Universitaria Senese	Siena	Italy
Marco Antonio	Bellini	marcoantonio.bellini@ao-siena.toscana.it	Ambulatory Chronic Polipathology of Siena, Department of Medicine, Surgery and Neurosciences, University of Siena, Siena, Italy	Siena	Italy
Loredaria	Adamo	loredaria.adamo@dbm.unisi.it	Medical Genetics, University of Siena, Italy; Med Biotech Hub and Competence Center, Department of Medical Biotechnologies, University of Siena	Siena	Italy
Viola Bianca	Serio	viola.serio@dbm.unisi.it	Medical Genetics, University of Siena, Italy; Med Biotech Hub and Competence Center, Department of Medical Biotechnologies, University of Siena	Siena	Italy
Enrica	Antolini	enrica.antolini@dbm.unisi.it	Medical Genetics, University of Siena, Italy; Med Biotech Hub and Competence Center, Department of Medical Biotechnologies, University of Siena	Siena	Italy
Giulia	Micheli	giulia.micheli@policlinogemelli.it	Clinic of Infectious Diseases, Catholic University of the Sacred Heart	Rome	Italy
Alessio	Bellucci	alessio.bellucci@uslnordovest.toscana.it	Infectious Diseases Unit, Santa Maria Annunziata Hospital, USL Centro	Florence	Italy
Mario	Giobba	mario.giobbia@aulss2.veneto.it	Department of Infectious Diseases, Treviso Hospital, Local Health Unit 2 Marca Trevigiana	Treviso	Italy
Monica	Basso	monica.basso@unipd.it	Department of Molecular Medicine, University of Padova	Padova	Italy

## Sheet: GEN-COVID (Spain)
GEN-COVID consortium (Spain)	(authors listed in alphabetic order)
www.gencovid.eu
Last name, first name	Affiliation	Contribution
Aguilera Guirao, Antonio	Microbiology Service, Hospital Clínico Universitario de Santiago, Santiago de Compostela, Galicia, Spain	Data and Sample Collection Member
Alfayate, Santiago	Pediatrics service, Hospital Virgen de la Arrixaca, Murcia, Spain	Data and Sample Collection Member
Álvarez Escudero, Julián	Anesthesiology and Resuscitation Service, Hospital Clínico Universitario de Santiago, Santiago de Compostela, Galicia, Spain	Data and Sample Collection Member
Antela López, Antonio	Internal Medicine Service, Hospital Clínico Universitario de Santiago, Santiago de Compostela, Galicia, Spain	Data and Sample Collection Member
Barbeito Castiñeiras, Gema	Microbiology Service, Hospital Clínico Universitario de Santiago, Santiago de Compostela, Galicia, Spain	Data and Sample Collection Member
Bastón-Rey, iria	Digestive Service, Hospital Clínico Universitario de Santiago, Santiago de Compostela, Galicia, Spain.	Data and Sample Collection Member
Bello Paderne, Xabier	Translational Pediatrics and Infectious Diseases, Pediatrics Department, Hospital Clínico Universitario de Santiago, Santiago de Compostela, Spain, and GENVIP Research Group (www.genvip.org), Instituto de Investigación Sanitaria de Santiago, Universidad de Santiago de Compostela, Galicia, Spain	Data Analysis Team Member
Ben García, Miriam	Translational Pediatrics and Infectious Diseases, Pediatrics Department, Hospital Clínico Universitario de Santiago, Santiago de Compostela, Spain, and GENVIP Research Group (www.genvip.org), Instituto de Investigación Sanitaria de Santiago, Universidad de Santiago de Compostela, Galicia, Spain	Data and Sample Collection Member
Cabero, María Jesús	Pediatrics service, Hospital Marqués de Valdecilla, Santander, Cantabria, Spain	Data and Sample Collection Member
Calviño-Suárez, Cristina	Digestive Service, Hospital Clínico Universitario de Santiago, Santiago de Compostela, Galicia, Spain.	Data and Sample Collection Member
Calvo, Cristina	Pediatrics service, Hospital universitario La Paz, Madrid, Spain	Data and Sample Collection Member
Carazo, Beatriz	Pediatrics service, Hospital Carlos Haya, Málaga, Andalucía, Spain	Data and Sample Collection Member
Carral García, María Victoria	Director of Nursing Processes, Hospital Clínico Universitario de Santiago, Santiago de Compostela, Galicia, Spain	Data and Sample Collection Member
Cebey López, Miriam	Translational Pediatrics and Infectious Diseases, Pediatrics Department, Hospital Clínico Universitario de Santiago, Santiago de Compostela, Spain, and GENVIP Research Group (www.genvip.org), Instituto de Investigación Sanitaria de Santiago, Universidad de Santiago de Compostela, Galicia, Spain	Data and Sample Collection Member
Cobo Vazquez, Elvira	Pediatrics service, Hospital Universitario Fundación de Alcorcón, Madrid, Spain	Data and Sample Collection Member
Coira Nieto, Amparo	Microbiology Service, Hospital Clínico Universitario de Santiago, Santiago de Compostela, Galicia, Spain	Data and Sample Collection Member
Conde Pájaro, Mónica	Preventive Medicine Unit, Hospital Clínico Universitario de Santiago, Santiago de Compostela, Galicia, Spain	Data and Sample Collection Member
Costa Alcalde, José Javier	Microbiology Service, Hospital Clínico Universitario de Santiago, Santiago de Compostela, Galicia, Spain	Data and Sample Collection Member
Currás Tuala, María José	Translational Pediatrics and Infectious Diseases, Pediatrics Department, Hospital Clínico Universitario de Santiago, Santiago de Compostela, Spain, and GENVIP Research Group (www.genvip.org), Instituto de Investigación Sanitaria de Santiago, Universidad de Santiago de Compostela, Galicia, Spain	Data and Sample Collection Member
Dacosta Urbieta, Ana Isabel	Translational Pediatrics and Infectious Diseases, Pediatrics Department, Hospital Clínico Universitario de Santiago, Santiago de Compostela, Spain, and GENVIP Research Group (www.genvip.org), Instituto de Investigación Sanitaria de Santiago, Universidad de Santiago de Compostela, Galicia, Spain	Data and Sample Collection Member
de la Cruz, Jesús	Pediatrics service, Complejo Hospitalario de Jaén, Andalucía, Spain	Data and Sample Collection Member
Díaz Esteban, Blanca	Translational Pediatrics and Infectious Diseases, Pediatrics Department, Hospital Clínico Universitario de Santiago, Santiago de Compostela, Spain, and GENVIP Research Group (www.genvip.org), Instituto de Investigación Sanitaria de Santiago, Universidad de Santiago de Compostela, Galicia, Spain	Data and Sample Collection Member
Domínguez Santalla, María Jesús	Internal Medicine Service, Hospital Clínico Universitario de Santiago, Santiago de Compostela, Galicia, Spain	Data and Sample Collection Member
Epalza, Cristina	Pediatrics service, Hospital 12 Octubre, Madrid, Spain	Data and Sample Collection Member
Fernández Pérez, Cristina	Preventive Medicine Unit, Hospital Clínico Universitario de Santiago, Santiago de Compostela, Galicia, Spain	Data and Sample Collection Member
Fernández Villaverde, Juan	Intensive Care Service, Hospital Clínico Universitario de Santiago, Santiago de Compostela, Galicia, Spain	Data and Sample Collection Member
Ferreiro-Iglesias, Rocio	Digestive Service, Hospital Clínico Universitario de Santiago, Santiago de Compostela, Galicia, Spain.	Data and Sample Collection Member
Ferreirós, Isabel	Translational Pediatrics and Infectious Diseases, Pediatrics Department, Hospital Clínico Universitario de Santiago, Santiago de Compostela, Spain, and GENVIP Research Group (www.genvip.org), Instituto de Investigación Sanitaria de Santiago, Universidad de Santiago de Compostela, Galicia, Spain	Data and Sample Collection Member
Flores Perez, Patricia	Pediatrics service, Hospital Infantil Universitario Niño Jesús, Madrid, Spain	Data and Sample Collection Member
Galbán Rodríguez, Cristóbal	Intensive Care Service, Hospital Clínico Universitario de Santiago, Santiago de Compostela, Galicia, Spain	Data and Sample Collection Member
García Allut, José Luis	Intensive Care Service, Hospital Clínico Universitario de Santiago, Santiago de Compostela, Galicia, Spain	Data and Sample Collection Member
García Vicente, Luisa	Translational Pediatrics and Infectious Diseases, Pediatrics Department, Hospital Clínico Universitario de Santiago, Santiago de Compostela, Spain, and GENVIP Research Group (www.genvip.org), Instituto de Investigación Sanitaria de Santiago, Universidad de Santiago de Compostela, Galicia, Spain	Data and Sample Collection Member
Gembero, Eva	Pediatrics service, Hospital Virgen del Camino, Pamplona, Navarra, Spain	Data and Sample Collection Member
Gil, Francisco	Pediatrics service, Hospital Virgen del Camino, Pamplona, Navarra, Spain	Data and Sample Collection Member
Giráldez Vázquez, Elena	Intensive Care Service, Hospital Clínico Universitario de Santiago, Santiago de Compostela, Galicia, Spain	Data and Sample Collection Member
Gómez Carballa, Alberto	Translational Pediatrics and Infectious Diseases, Pediatrics Department, Hospital Clínico Universitario de Santiago, Santiago de Compostela, Spain, and GENVIP Research Group (www.genvip.org), Instituto de Investigación Sanitaria de Santiago, Universidad de Santiago de Compostela, Galicia, Spain	Data Analysis Team Member
Gómez Rial, José	Translational Pediatrics and Infectious Diseases, Pediatrics Department, Hospital Clínico Universitario de Santiago, Santiago de Compostela, Spain, and GENVIP Research Group (www.genvip.org), Instituto de Investigación Sanitaria de Santiago, Universidad de Santiago de Compostela, Galicia, Spain	Data and Sample Collection Member
González Barcala, Francisco Javier	Pneumology Service, Hospital Clínico Universitario de Santiago, Santiago de Compostela, Galicia, Spain	Data and Sample Collection Member
Grasa, Carlos	Pediatrics service, Hospital universitario La Paz, Madrid, Spain	Data and Sample Collection Member
Guerra Liñares, Beatriz	Preventive Medicine Unit, Hospital Clínico Universitario de Santiago, Santiago de Compostela, Galicia, Spain	Data and Sample Collection Member
Herranz, Mercedes	Pediatrics service, Hospital Virgen del Camino, Pamplona, Navarra, Spain	Data and Sample Collection Member
Jiménez, Raquel	Pediatrics service, Hospital Infantil Universitario Niño Jesús, Madrid, Spain	Data and Sample Collection Member
Leboráns Iglesias, Pilar	Translational Pediatrics and Infectious Diseases, Pediatrics Department, Hospital Clínico Universitario de Santiago, Santiago de Compostela, Spain, and GENVIP Research Group (www.genvip.org), Instituto de Investigación Sanitaria de Santiago, Universidad de Santiago de Compostela, Galicia, Spain	Data and Sample Collection Member
Lence Massa, Beatriz	Intensive Care Service, Hospital Clínico Universitario de Santiago, Santiago de Compostela, Galicia, Spain	Data and Sample Collection Member
Lendoiro Fuentes, Marta	Translational Pediatrics and Infectious Diseases, Pediatrics Department, Hospital Clínico Universitario de Santiago, Santiago de Compostela, Spain, and GENVIP Research Group (www.genvip.org), Instituto de Investigación Sanitaria de Santiago, Universidad de Santiago de Compostela, Galicia, Spain	Data and Sample Collection Member
León, Mari Cruz	Pediatrics service, Hospital Virgen de la Arrixaca, Murcia, Spain	Data and Sample Collection Member
López Franco, Montserrat	Translational Pediatrics and Infectious Diseases, Pediatrics Department, Hospital Clínico Universitario de Santiago, Santiago de Compostela, Spain, and GENVIP Research Group (www.genvip.org), Instituto de Investigación Sanitaria de Santiago, Universidad de Santiago de Compostela, Galicia, Spain	Data and Sample Collection Member
López Lago, Ana	Intensive Care Service, Hospital Clínico Universitario de Santiago, Santiago de Compostela, Galicia, Spain	Data and Sample Collection Member
Martín Moya, María Rocío	Pediatrics service, Complejo Hospitalario de Jaén, Andalucía, Spain	Data and Sample Collection Member
Martínez Padilla, María del Carmen	Pediatrics service, Complejo Hospitalario de Jaén, Andalucía, Spain	Data and Sample Collection Member
Martínez Rebollo, María de las Mercedes	Pediatrics service, Complejo Hospitalario de Jaén, Andalucía, Spain	Data and Sample Collection Member
Martinón-Torres, Federico	Translational Pediatrics and Infectious Diseases, Pediatrics Department, Hospital Clínico Universitario de Santiago, Santiago de Compostela, Spain, and GENVIP Research Group (www.genvip.org), Instituto de Investigación Sanitaria de Santiago, Universidad de Santiago de Compostela, Galicia, Spain	Data and Sample Collection Member
Montoto Louzao, Julián	Translational Pediatrics and Infectious Diseases, Pediatrics Department, Hospital Clínico Universitario de Santiago, Santiago de Compostela, Spain, and GENVIP Research Group (www.genvip.org), Instituto de Investigación Sanitaria de Santiago, Universidad de Santiago de Compostela, Galicia, Spain	Data and Sample Collection Member
Moreno, David	Pediatrics service, Hospital Carlos Haya, Málaga, Andalucía, Spain	Data and Sample Collection Member
Moreno, Laura	Pediatrics service, Hospital Virgen del Camino, Pamplona, Navarra, Spain	Data and Sample Collection Member
Navarro De la Cruz, Daniel	Microbiology Service, Hospital Clínico Universitario de Santiago, Santiago de Compostela, Galicia, Spain	Data and Sample Collection Member
Núñez Masid, Eloína	Manager of the Health Care Area of Santiago de Compostela and Barbanza, Hospital Clínico Universitario de Santiago, Santiago de Compostela, Galicia, Spain	Data and Sample Collection Member
Ortolá Devesa, Juan Bautista	Clinical Chemistry Laboratory, Hospital Clínico Universitario de Santiago, Santiago de Compostela, Galicia, Spain	Data and Sample Collection Member
Pardo Seco, Jacobo	Translational Pediatrics and Infectious Diseases, Pediatrics Department, Hospital Clínico Universitario de Santiago, Santiago de Compostela, Spain, and GENVIP Research Group (www.genvip.org), Instituto de Investigación Sanitaria de Santiago, Universidad de Santiago de Compostela, Galicia, Spain	Data and Sample Collection Lead - PI of the GEN-COVID project
Pazo Núñez, María	Internal Medicine Service, Hospital Clínico Universitario de Santiago, Santiago de Compostela, Galicia, Spain	Data and Sample Collection Member
Pérez Aragón, Ana	Pediatrics service, Hospital Materno-Infantil Virgen de las Nieves, Granada, Spain	Data and Sample Collection Member
Pérez del Molino Bernal, Marisa	Microbiology Service, Hospital Clínico Universitario de Santiago, Santiago de Compostela, Galicia, Spain	Data and Sample Collection Member
Pérez Freixo, Hugo	Preventive Medicine Unit, Hospital Clínico Universitario de Santiago, Santiago de Compostela, Galicia, Spain	Data and Sample Collection Member
Piñeiro Rodríguez, Lidia	Translational Pediatrics and Infectious Diseases, Pediatrics Department, Hospital Clínico Universitario de Santiago, Santiago de Compostela, Spain, and GENVIP Research Group (www.genvip.org), Instituto de Investigación Sanitaria de Santiago, Universidad de Santiago de Compostela, Galicia, Spain	Data and Sample Collection Member
Pischedda, Sara	Translational Pediatrics and Infectious Diseases, Pediatrics Department, Hospital Clínico Universitario de Santiago, Santiago de Compostela, Spain, and GENVIP Research Group (www.genvip.org), Instituto de Investigación Sanitaria de Santiago, Universidad de Santiago de Compostela, Galicia, Spain	Data and Sample Collection Member
Portela Romero, Manuel	Deputy Director of Pharmaceutical Delivery, Training, Teaching, Research and Innovation, Hospital Clínico Universitario de Santiago, Santiago de Compostela, Galicia, Spain	Data and Sample Collection Member
Pose Reino, Antonio	Internal Medicine Service, Hospital Clínico Universitario de Santiago, Santiago de Compostela, Galicia, Spain	Data and Sample Collection Member
Prada Hervella, Gloria María	Anesthesiology and Resuscitation Service, Hospital Clínico Universitario de Santiago, Santiago de Compostela, Galicia, Spain	Data and Sample Collection Member
Queiro Verdes, Teresa	Preventive Medicine Unit, Hospital Clínico Universitario de Santiago, Santiago de Compostela, Galicia, Spain	Data and Sample Collection Member
Redondo Collazo, Lorenzo	Translational Pediatrics and Infectious Diseases, Pediatrics Department, Hospital Clínico Universitario de Santiago, Santiago de Compostela, Spain, and GENVIP Research Group (www.genvip.org), Instituto de Investigación Sanitaria de Santiago, Universidad de Santiago de Compostela, Galicia, Spain	Data and Sample Collection Member
Regueiro Casuso, Patricia	Translational Pediatrics and Infectious Diseases, Pediatrics Department, Hospital Clínico Universitario de Santiago, Santiago de Compostela, Spain, and GENVIP Research Group (www.genvip.org), Instituto de Investigación Sanitaria de Santiago, Universidad de Santiago de Compostela, Galicia, Spain	Data and Sample Collection Member
Rey García, Susana	Translational Pediatrics and Infectious Diseases, Pediatrics Department, Hospital Clínico Universitario de Santiago, Santiago de Compostela, Spain, and GENVIP Research Group (www.genvip.org), Instituto de Investigación Sanitaria de Santiago, Universidad de Santiago de Compostela, Galicia, Spain	Data and Sample Collection Member
Rey Vázquez, Sara	Translational Pediatrics and Infectious Diseases, Pediatrics Department, Hospital Clínico Universitario de Santiago, Santiago de Compostela, Spain, and GENVIP Research Group (www.genvip.org), Instituto de Investigación Sanitaria de Santiago, Universidad de Santiago de Compostela, Galicia, Spain	Data and Sample Collection Member
Reyes, Susana Beatriz	Pediatrics service, Hospital Virgen de la Arrixaca, Murcia, Spain	Data and Sample Collection Member
Riveiro Blanco, Vanessa	Pneumology Service, Hospital Clínico Universitario de Santiago, Santiago de Compostela, Galicia, Spain	Data and Sample Collection Member
Rivero Calle, Irene	Translational Pediatrics and Infectious Diseases, Pediatrics Department, Hospital Clínico Universitario de Santiago, Santiago de Compostela, Spain, and GENVIP Research Group (www.genvip.org), Instituto de Investigación Sanitaria de Santiago, Universidad de Santiago de Compostela, Galicia, Spain	Data and Sample Collection Coordinator
Rivero Velasco, Carmen	Intensive Care Service, Hospital Clínico Universitario de Santiago, Santiago de Compostela, Galicia, Spain	Data and Sample Collection Member
Rodríguez Núñez, Nuria	Pneumology Service, Hospital Clínico Universitario de Santiago, Santiago de Compostela, Galicia, Spain	Data and Sample Collection Member
Rodríguez-Tenreiro Sánchez, Carmen	Translational Pediatrics and Infectious Diseases, Pediatrics Department, Hospital Clínico Universitario de Santiago, Santiago de Compostela, Spain, and GENVIP Research Group (www.genvip.org), Instituto de Investigación Sanitaria de Santiago, Universidad de Santiago de Compostela, Galicia, Spain	Data and Sample Collection Member
Rodríguez, Jorge	Pediatrics service, Hospital Virgen del Camino, Pamplona, Navarra, Spain	Data and Sample Collection Member
Rojo, Pablo	Pediatrics service, Hospital 12 Octubre, Madrid, Spain	Data and Sample Collection Member
Ruíz del Prado, Mª Yolanda	Pediatrics service, Hospital San Pedro, La Rioja, Spain	Data and Sample Collection Member
Saborido Paz, Eva	Intensive Care Service, Hospital Clínico Universitario de Santiago, Santiago de Compostela, Galicia, Spain	Data and Sample Collection Member
Sadiki Orayyou, José Miguel	Translational Pediatrics and Infectious Diseases, Pediatrics Department, Hospital Clínico Universitario de Santiago, Santiago de Compostela, Spain, and GENVIP Research Group (www.genvip.org), Instituto de Investigación Sanitaria de Santiago, Universidad de Santiago de Compostela, Galicia, Spain	Data and Sample Collection Member
Saito Villanueva, Carla	Intensive Care Service, Hospital Clínico Universitario de Santiago, Santiago de Compostela, Galicia, Spain	Data and Sample Collection Member
Salas, Antonio	Translational Pediatrics and Infectious Diseases, Pediatrics Department, Hospital Clínico Universitario de Santiago, Santiago de Compostela, Spain, and GENVIP Research Group (www.genvip.org), Instituto de Investigación Sanitaria de Santiago, Universidad de Santiago de Compostela, Galicia, Spain	Data Analysis Team Lead - PI of the GEN-COVID project
Sanchiz, Sonia	Pediatrics service, Hospital Virgen de la Arrixaca, Murcia, Spain	Data and Sample Collection Member
Sanz, Débora	Pediatrics service, Hospital Marqués de Valdecilla, Santander, Cantabria, Spain	Data and Sample Collection Member
Serén Fernández, Sonia	Translational Pediatrics and Infectious Diseases, Pediatrics Department, Hospital Clínico Universitario de Santiago, Santiago de Compostela, Spain, and GENVIP Research Group (www.genvip.org), Instituto de Investigación Sanitaria de Santiago, Universidad de Santiago de Compostela, Galicia, Spain	Data and Sample Collection Member
Souto Sanmartín, Pablo	Preventive Medicine Unit, Hospital Clínico Universitario de Santiago, Santiago de Compostela, Galicia, Spain	Data and Sample Collection Member
Taboada Muñiz, Manuel	Anesthesiology and Resuscitation Service, Hospital Clínico Universitario de Santiago, Santiago de Compostela, Galicia, Spain	Data and Sample Collection Member
Trastoy Pena, Rocío	Microbiology Service, Hospital Clínico Universitario de Santiago, Santiago de Compostela, Galicia, Spain	Data and Sample Collection Member
Treviño Castellano, Mercedes	Microbiology Service, Hospital Clínico Universitario de Santiago, Santiago de Compostela, Galicia, Spain	Data and Sample Collection Member
Valdés Cuadrado, Luis	Pneumology Service, Hospital Clínico Universitario de Santiago, Santiago de Compostela, Galicia, Spain	Data and Sample Collection Member
Varela García, Pablo	Internal Medicine Service, Hospital Clínico Universitario de Santiago, Santiago de Compostela, Galicia, Spain	Data and Sample Collection Member
Vilas Iglesias, María Soledad	Translational Pediatrics and Infectious Diseases, Pediatrics Department, Hospital Clínico Universitario de Santiago, Santiago de Compostela, Spain, and GENVIP Research Group (www.genvip.org), Instituto de Investigación Sanitaria de Santiago, Universidad de Santiago de Compostela, Galicia, Spain	Data and Sample Collection Member
Viz Lasheras, Sandra	Translational Pediatrics and Infectious Diseases, Pediatrics Department, Hospital Clínico Universitario de Santiago, Santiago de Compostela, Spain, and GENVIP Research Group (www.genvip.org), Instituto de Investigación Sanitaria de Santiago, Universidad de Santiago de Compostela, Galicia, Spain	Data and Sample Collection Member

## Sheet: MSCIC
Mount Sinai Clinical Intelligence Center
Name	Last Name	email
Charuta Agashe	Agashe	Charuta.Agashe@mssm.edu
Priyal Agrawal	Agrawal	Priyal.Agrawal@mssm.edu
Alara Akyatan	Akyatan
Kasey Alesso-Carra	Alesso-Carra	kasey.alesso-carra@mountsinai.org
Eziwoma Alibo	Alibo	Eziwoma.Alibo@icahn.mssm.edu
Kelvin Alvarez	Alvarez
Angelo Amabile	Amabile	Angelo.Amabile@mssm.edu
Carmen Argmann	Argmann	Carmen.Argmann@mssm.edu
Kimberly Argueta	Argueta	Kimberly.Argueta@mssm.edu
Steven Ascolillo	Ascolillo	Steven.Ascolillo@mssm.edu
Rasheed Bailey	Bailey	Rasheed.Bailey@mssm.edu
Craig Batchelor	Batchelor
Aviva G. Beckmann	Beckmann	aviva.beckmann@gmail.com
Noam D. Beckmann	Beckmann	Noam.Beckmann@mssm.edu
Priya Begani	Begani	Priya.Begani@mssm.edu
Dusan Bogunovic	Bogunovic	Dusan.Bogunovic@mssm.edu
Swaroop Bose	Bose	Swaroop.Bose@mssm.edu
Cansu Cimen Bozkus	Cimen Bozkus	Cansu.CimenBozkus@mssm.edu
Paloma Bravo	Bravo	Paloma.Bravo@mssm.edu
Stacey-Ann Brown	Brown	Stacey-Ann.Brown@mountsinai.org
Mark Buckup	Buckup	Mark.Buckup@mssm.edu
Larissa Burka	Burka	Larissa.Burka@mountsinai.org
Sharlene Calorossi	Calorossi
Lena Cambron	Cambron	Lena.Cambron@mssm.edu
Guillermo Carbonell	Carbonell	Guillermo.Carbonell@mssm.edu
Gina Carrara	Carrara	Gina.Carrara@mssm.edu
Mario A. Cedillo	Cedillo	mario.cedillo@mountsinai.org
Christie Chang	Chang	christie1143@gmail.com
Serena Chang	Chang	Serena.Chang@mssm.edu
Alexander W. Charney	Charney	Alexander.Charney@icahn.mssm.edu
Steven T. Chen	Chen	steven.chen@icahn.mssm.edu
Esther Cheng	Cheng	esther.cheng@icahn.mssm.edu
Jonathan Chien	Chien	Jonathan.Chien@mssm.edu
Mashkura Chowdhury	Chowdhury	Mashkura.Chowdhury@mssm.edu
Jonathan Chung	Chung
Phillip H. Comella	Comella	phillip.comella@icahn.mssm.edu
Dana Cosgrove	Cosgrove	danaccosgrove@gmail.com
Francesca Cossarini	Cossarini	Francesca.Cossarini@mssm.edu
Liam Cotter	Cotter
Arpit Dave	Dave	Arpit.Dave@mssm.edu
Travis Dawson	Dawson	Travis.Dawson@mssm.edu
Bheesham Dayal	Dayal	Bheesham.Dayal@mssm.edu
Diane Marie Del Valle	Del-Valle	Diane.Delvalle@mssm.edu
Maxime Dhainaut	Dhainaut	Maxime.Dhainaut@mssm.edu
Rebecca Dornfeld	Dornfeld	llolla_s@yahoo.com
Katie Dul	Dul	kdul93@gmail.com
Melody Eaton	Eaton	Melody.Eaton@mssm.edu
Nissan Eber	Eber	nissaneber@gmail.com
Cordelia Elaiho	Elaiho	Cordelia.Elaiho@mssm.edu
Ethan Ellis	Ellis	Ethan.Ellis@mssm.edu
Frank Fabris	Fabris	Frank.Fabris@mssm.edu
Jeremiah Faith	Faith	Jeremiah.Faith@mssm.edu
Dominique Falci	Falci	dominiquefalci@gmail.com
Susie Feng	Feng	Susie.Feng@mssm.edu
Brian Fennessy	Fennessy	Brian.Fennessy@mssm.edu
Marie Fernandes	Fernandes	Marie.Fernandes@mssm.edu
Nataly Fishman	Fishman	Nataly.Fishman@mssm.edu
Nancy J. Francoeur	Francoeur	Nancy.Francoeur@mssm.edu
Sandeep Gangadharan	Gangadharan	Sandeep.Gangadharan@mssm.edu
Daniel Geanon	Geanon
Bruce D. Gelb	Gelb	bruce.gelb@mssm.edu
Benjamin S. Glicksberg	Glicksberg	Benjamin.Glicksberg@mssm.edu
Sacha Gnjatic	Gnjatic	Sacha.Gnjatic@mssm.edu
Joanna Grabowska	Grabowska	Joanna.Grabowska@mssm.edu
Gavin Gyimesi	Gyimesi	Gavin.Gyimesi@mssm.edu
Maha Hamdani	Hamdani	Maha.Hamdani@mssm.edu
Diana Handler	Handler	Diana.Handler@mssm.edu
Jocelyn Harris	Harris	Jocelyn.Harris@mssm.edu
Matthew Hartnett	Hartnett	matt.c.hartnett@gmail.com
Sandra Hatem	Hatem	Sandra.Hatem@mssm.edu
Manon Herbinet	Herbinet	Manon.Herbinet@mssm.edu
Elva Herrera	Herrera	Elva.Herrera@mssm.edu
Arielle Hochman	Hochman	ariellehochman@gmail.com
Gabriel E. Hoffman	Hoffman	Gabriel.Hoffman@mssm.edu
Jaime Hook	Hook	Jaime.Hook@mssm.edu
Laila Horta	Horta	Laila.Horta@mssm.edu
Etienne Humblin	Humblin	Etienne.Humblin@mssm.edu
Suraj Jaladanki	Jaladanki	suraj.jaladanki@icahn.mssm.edu
Hajra Jamal	Jamal	Hajra.Jamal@mssm.edu
Jessica S. Johnson	Johnson	Jessica.Johnson@mssm.edu
Daniel Jordan	Jordan	daniel.jordan1@mssm.edu
Gurpawan Kang	Kang
Neha Karekar	Karekar	Neha.Karekar@mssm.edu
Subha Karim	Karim	Subha.Karim@mssm.edu
Geoffrey Kelly	Kelly	Geoffrey.Kelly@mssm.edu
Jong Kim	Kim	Jong.Kim@mssm.edu
Seunghee Kim-Schulze	Kim-Schulze	Seunghee.Kim-Schulze@mssm.edu
Edgar Kozlova	Kozlova	Edgar.Gonzalez-Kozlova@mssm.edu
Arvind Kumar	Kumar	Arvind.Kumar@mssm.edu
Jose Lacunza	Lacunza	Jose.Lacunza@mssm.edu
Alona Lansky	Lansky
Jessica Le Berichel	Le Berichel	Jessica.LeBerichel@mssm.edu
Dannielle Lebovitch	Lebovitch	dannielle.lebovitch@icahn.mssm.edu
Brian Lee	Lee	Brian.Lee@mssm.edu
Grace Lee	Lee	grace.lee@mountsinai.org
Gyu Ho Lee	Lee	Gyu.Lee@mssm.edu
Jacky Lee	Lee	Jacky.Lee@mssm.edu
John Leech	Leech	John.Leech@mssm.edu
Lauren Lepow	Lepow	Lauren.Lepow@icahn.mssm.edu
Michael B. Leventhal	Leventhal	Michael.Leventhal@icahn.mssm.edu
Lora E. Liharska	Liharska	Lora.Liharska@icahn.mssm.edu
Katherine Lindblad	Lindblad	Katherine.Lindblad@mssm.edu
Alexandra Livanos	Livanos	Alexandra.Livanos@mssm.edu
Rosalie Machado	Machado	Rosalie.Machado@mssm.edu
Kent Madrid	Madrid	Kent.Madrid@mssm.edu
Zafar Mahmood	Mahmood	Zafar.Mahmood@mssm.edu
Kelcey Mar	Mar	Kelcey.Mar@mssm.edu
Thomas U. Marron	Marron	thomas.marron@mssm.edu
Glenn Martin	Martin	Glenn.Martin@mssm.edu
Robert Marvin	Marvin	Robert.Marvin@mssm.edu
Shrisha Maskey	Maskey	Shrisha.Maskey@mssm.edu
Paul Matthews	Matthews	Paul.Matthews@mssm.edu
Katherine Meckel	Meckel	Katherine.Meckel@mssm.edu
Saurabh Mehandru	Mehandru	Saurabh.Mehandru@mssm.edu
Miriam Merad	Merad	Miriam.Merad@mssm.edu
Cynthia Mercedes	Mercedes	Cynthia.Mercedes@mssm.edu
Elyze Merzier	Merzier	Elyze.Merzier@mssm.edu
Dara Meyer	Meyer	Dara.Meyer@mssm.edu
Gurkan Mollaoglu	Mollaoglu	Gurkan.Mollaoglu@mssm.edu
Sarah Morris	Morris	sarah.morris0604@gmail.com
Konstantinos Mouskas	Mouskas	Konstantinos.Mouskas@mountsinai.org
Emily Moya	Moya	emilynmoya@gmail.com
Girish Nadkarni	Nadkarni	girish.nadkarni@mountsinai.org
Kai Nie	Nie	Kai.Nie@mssm.edu
Marjorie Nisenholtz	Nisenholtz	Marjorie.Nisenholtz@mssm.edu
George Ofori-Amanfo	Ofori-Amanfo	George.Ofori-Amanfo@mssm.edu
Kenan Onel	Onel	Kenan.Onel@mssm.edu
Merouane Ounadjela	Ounadjela
Manishkumar Patel	Patel	Manishkumar.Patel@mssm.edu
Vishwendra Patel	Patel	Vishwendra.Patel@mssm.edu
Cassandra Pruitt	Pruitt	Cassandra.Pruitt@icahn.mssm.edu
Adeeb Rahman	Rahman	adeebr@gmail.com
Shivani Rathi	Rathi	Shivani.Rathi@mssm.edu
Jamie Redes	Redes	Jamie.Redes@icahn.mssm.edu
Ivan Reyes-Torres	Reyes-Torres	Ivan.Reyes-Torres@mssm.edu
Alcina Rodrigues	Rodrigues	Alcina.Rodrigues@mssm.edu
Alfonso Rodriguez	Rodriguez	Alfonso.Rodriguez@mssm.edu
Vladimir Roudko	Roudko	Vladimir.Roudko@mssm.edu
Panagiotis Roussos	Roussos	Panagiotis.Roussos@mssm.edu
Evelyn Ruiz	Ruiz	Evelyn.Ruiz@mssm.edu
Pearl Scalzo	Scalzo	scalzo.pearl20@gmail.com
Eric E. Schadt	Schadt	Eric.Schadt@mssm.edu
Ieisha Scott	Scott	Ieisha.Scott@mssm.edu
Robert Sebra	Sebra	Robert.Sebra@mssm.edu
Sandra Serrano	Serrano	sandra.serrano@mssm.edu
Hardik Shah	Shah	Hardik.Shah@mssm.edu
Mark Shervey	Shervey	Mark.Shervey@mssm.edu
Pedro Silva	Silva	Pedro.Silva@mssm.edu
Nicole W. Simons	Simons	Nicole.Simons@mssm.edu
Laura Sloofman	Sloofman	laura.sloofman@mssm.edu
Melissa Smith	Smith	Melissa.Smith@mssm.edu
Alessandra Soares Schanoski	Soares-Schanoski	Alessandra.Soares.Schanoski@mssm.edu
Juan Soto	Soto	juan.soto2@mssm.edu
Shwetha Hara Sridhar	Sridhar	ShwethaHara.Sridhar@mssm.edu
Hiyab Stefanos	Stefanos
Meghan Straw	Straw	Meghan.Straw@gmail.com
Robert Sweeney	Sweeney	robert.sweeney@mountsinai.org
Alexandra Tabachnikova	Tabachnikova	Alexandra.Tabachnikova@mssm.edu
Collin Teague	Teague	Collin.Teague@mssm.edu
Ryan Thompson	Thompson	Ryan.Thompson2@mssm.edu
Manying Tin	Tin	Manying.Tin@mssm.edu
Kevin Tuballes	Tuballes	Kevin.Tuballes@mssm.edu
Scott R. Tyler	Tyler	Scott.Tyler@mssm.edu
Bhaskar Upadhyaya	Upadhyaya	Bhaskar.Upadhyaya@mssm.edu
Akhil Vaid	Vaid	Akhil.Vaid@mssm.edu
Verena Van Der Heide	Van-Der-Heide	Verena.VanDerHeide@mssm.edu
Natalie Vaninov	Vaninov	Natalie.Vaninov@mssm.edu
Konstantinos Vlachos	Vlachos	Konstantinos.Vlachos@mssm.edu
Daniel Wacker	Wacker	Daniel.Wacker@mssm.edu
Laura Walker	Walker
Hadley Walsh	Walsh	hadley.walsh@mountsinai.org
Bo Wang	Wang	Bo.Wang@mountsinai.org
Wenhui Wang	Wang	Wenhui.Wang@mssm.edu
Ying-chih Wang	Wang	Ying-chih.Wang@mssm.edu
Matthias Wilk	Wilk	matthias.Wilk@mssm.edu
Lillian Wilkins	Wilkins	lillian.wilkins@mssm.edu
Jessica Wilson	Wilson	Jessica.Wilson@mssm.edu
Karen M. Wilson	Wilson	Karen.Wilson@mountsinai.org
Hui Xie	Xie	Hui.Xie@mssm.edu
Li Xue	Xue	Li.Xue@mssm.edu
Naa-akomaah Yeboah	Yeboah	naa-akomaah.yeboah@mountsinai.org
Nancy Yi	Yi	Nancy.Yi@mssm.edu
Mahlet Yishak	Yishak	Mahlet.Yishak@mssm.edu
Sabina Young	Young	sabinacyoung@gmail.com
Alex Yu	Yu	wayne.a.u39@gmail.com
Nicholas	Zaki	nicholas.zaki@mssm.edu
Nina	Zaks	Nina.Zaks@mssm.edu
Renyuan Zha	Zha	Renyuan.Zha@mssm.edu
